# Supplementary material for: Unique quenching of fluorescent copper nanoclusters based on target-induced oxidation effect: a simple, label-free, highly sensitive and specific bleomycin assay
Source: Royal Society of Chemistry journal article supplement (doi:10.1039/c6ra09054k), 2016-01-01
Supplement: c6ra09054k1.pdf [file c6ra09054k1.pdf]

## Supporting Information

### **Unique quenching of fluorescent copper nanoclusters based on target-induced oxidation effect: a simple, label-free, highly sensitive and specific bleomycin assay**

Haiyin Li,<sup>§</sup> Chuanfeng Wang,<sup>§</sup> Panpan Gai, Ting Hou, Lei Ge\* and Feng Li\*

College of Chemistry and Pharmaceutical Sciences, Qingdao Agricultural University,  
Qingdao 266109, People's Republic of China

<sup>§</sup>H.Y. Li and C.F. Wang contributed equally to this work.

\* Corresponding authors. Tel/Fax: 86-532-86080855

E-mail: lifeng@qust.edu.cn (F. Li), lge@qau.edu.cn (L. Ge)

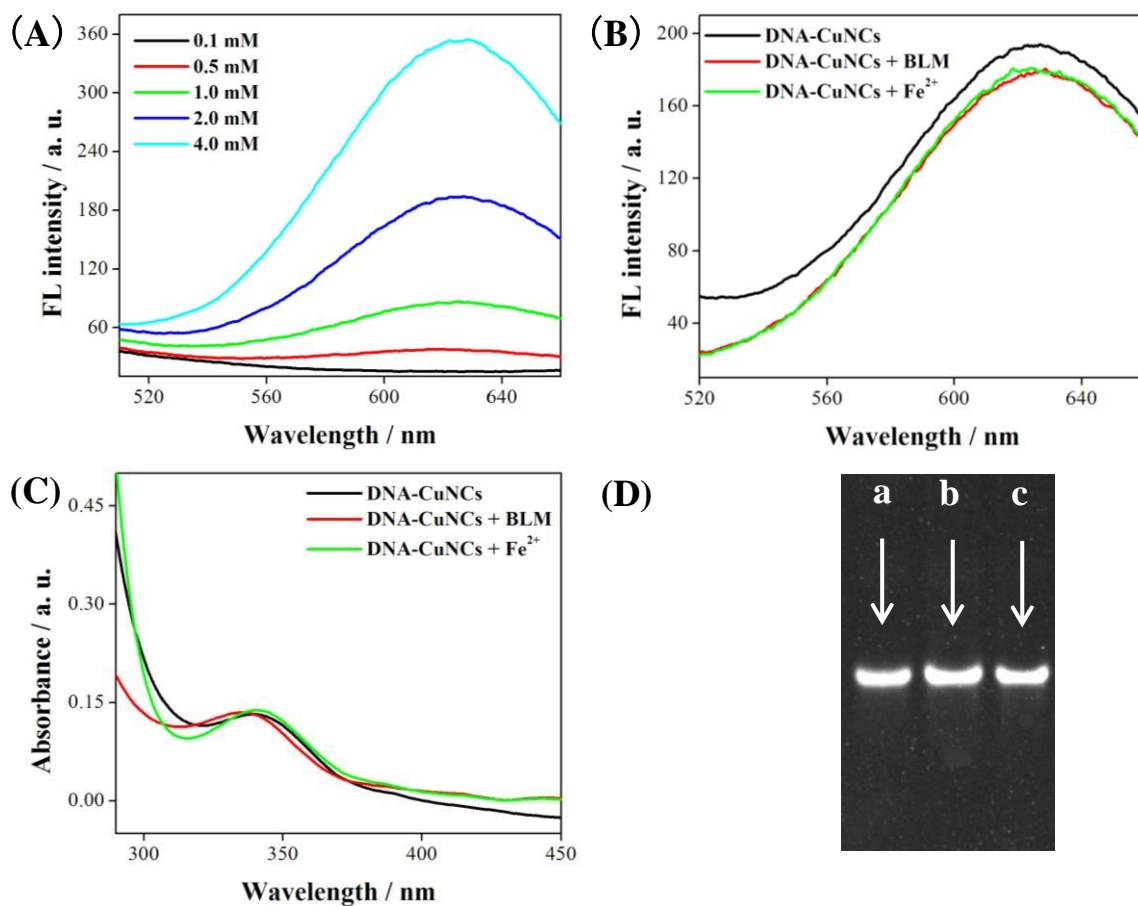

Fig. S1. (A) Fluorescence spectra of CuNCs obtained using sodium ascorbate with different concentrations; (B) Fluorescence spectra of CuNCs under different conditions; (C) UV-Vis spectra of CuNCs under different conditions; (D) Agarose gel (5%) electrophoresis images of (a) DNA, (b) CuNCs, and (c) CuNCs pre-incubation with BLM.

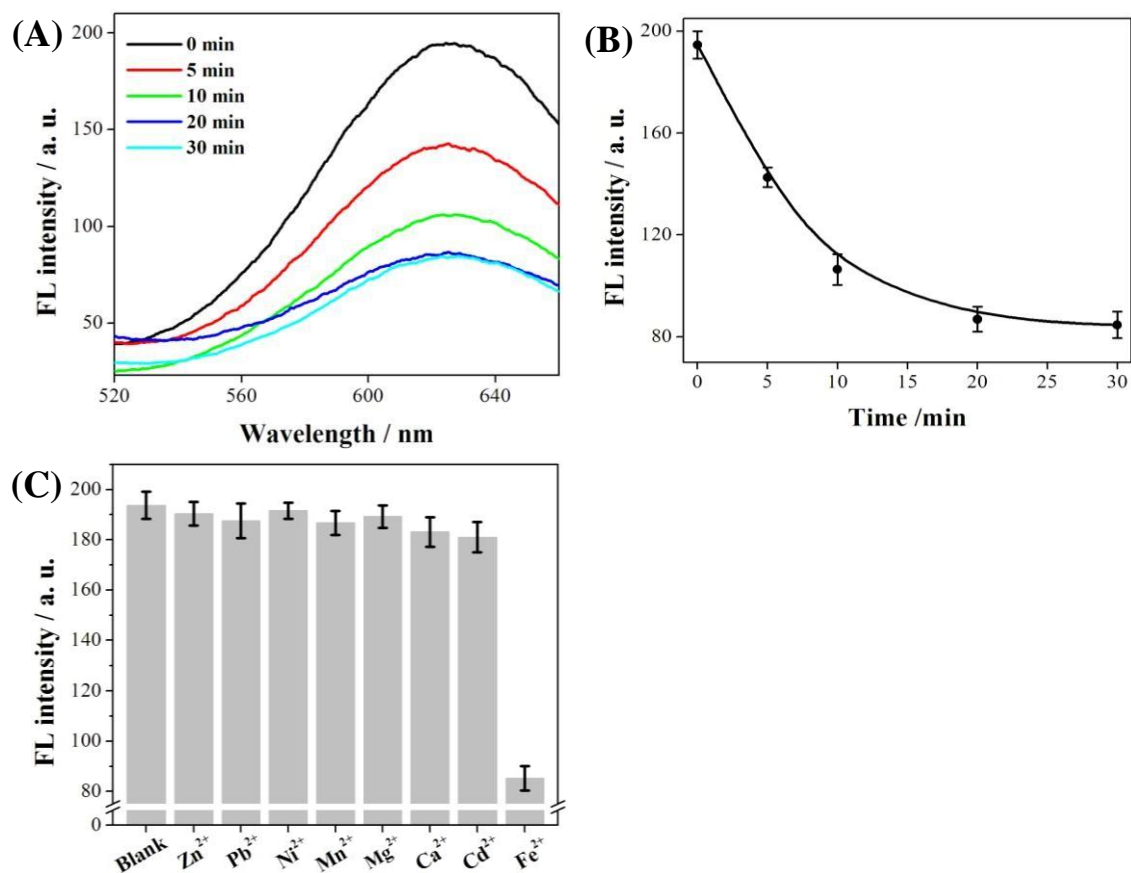

Fig. S2. (A) The fluorescence spectra of CuNCs upon the addition of BLM (8  $\mu\text{M}$ ) with different incubation times; (B) FL intensity of CuNCs at 626 nm versus the reaction time with BLM sample (8  $\mu\text{M}$ ) in MOPS buffer; (C) FL intensity of CuNCs incubated with the mixture of BLM and different metal ions. The concentrations of BLM and metal ions were all 8  $\mu\text{M}$ . The error bars represent the standard deviation of three repetitive measurements.

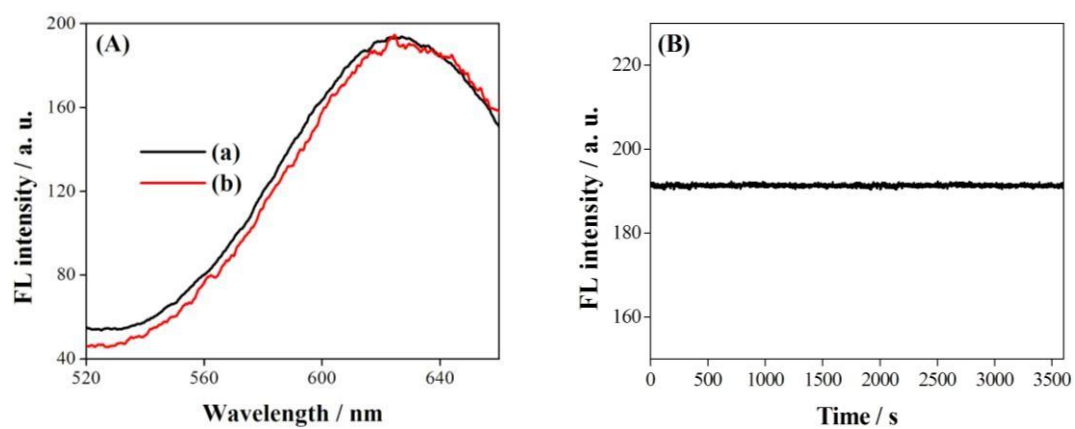

Fig. S3. (A) Fluorescence spectra of CuNCs in (a) MOPS buffer and (b) human serum sample; (B) FL intensity (at 626 nm) of CuNCs in human serum sample vs. the time after CuNCs being added into the serum sample. Conditions: [DNA] = 0.5  $\mu\text{M}$ ;  $[\text{Cu}^{2+}]$  = 100  $\mu\text{M}$ ; [sodium ascorbate] = 2.0 mM; 10 mM MOPS buffer (pH 7.6, containing 150 mM NaCl).

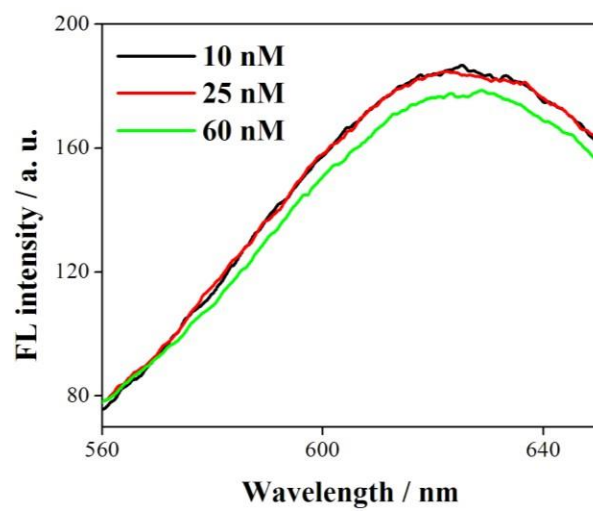

Fig. S4. The fluorescence spectra of CuNCs under different BLM concentrations in serum samples

**Table S1.** Detection of BLM spiked in serum samples (n = 3)

| Sample No. | Added (nM) | Mean measured<br>(nM) | Mean recovery <sup>a</sup><br>(%) | RSD (%) |
|------------|------------|-----------------------|-----------------------------------|---------|
| 1          | 10.0       | 9.6                   | 96                                | 8.46    |
| 2          | 25.0       | 27.0                  | 108                               | 7.91    |
| 3          | 60.0       | 61.8                  | 103                               | 9.85    |

<sup>a</sup>Recovery (%) =  $100 \times (C_{\text{mean found}} / C_{\text{added}})$
